# Supplementary material for: CD3+ Macrophages Deliver Proinflammatory Cytokines by a CD3- and Transmembrane TNF-Dependent Pathway and Are Increased at the BCG-Infection Site
Source: PubMed Central journal article supplement (PMC6855269; doi:10.3389/fimmu.2019.02550), 2019-11-07
Supplement: Image_1.pdf [file Image_1.pdf]

# A CD14+ cells isolated

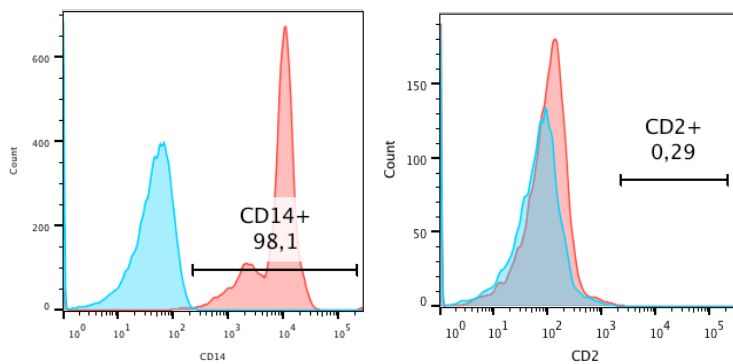

# B 7th Day post-culture

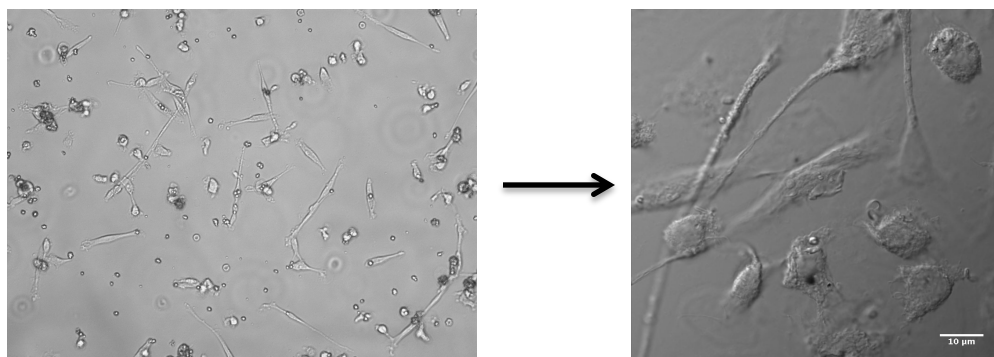

# C

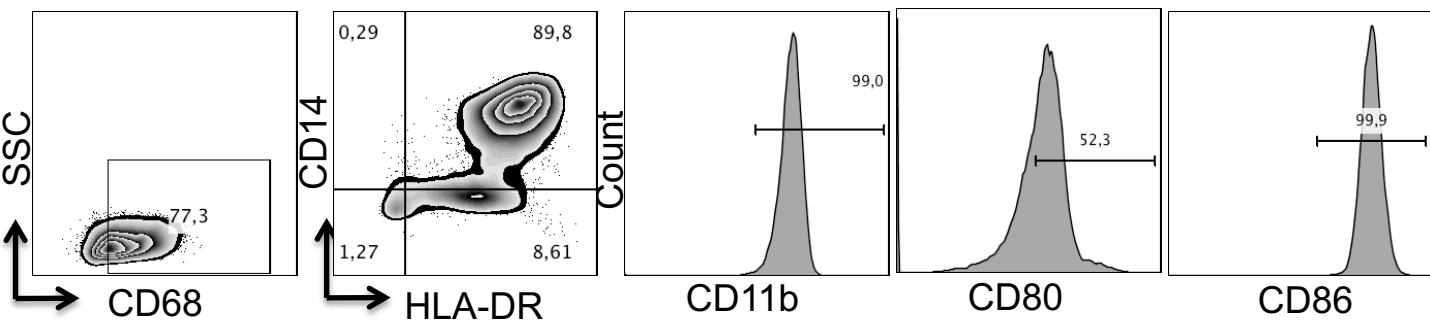

# D

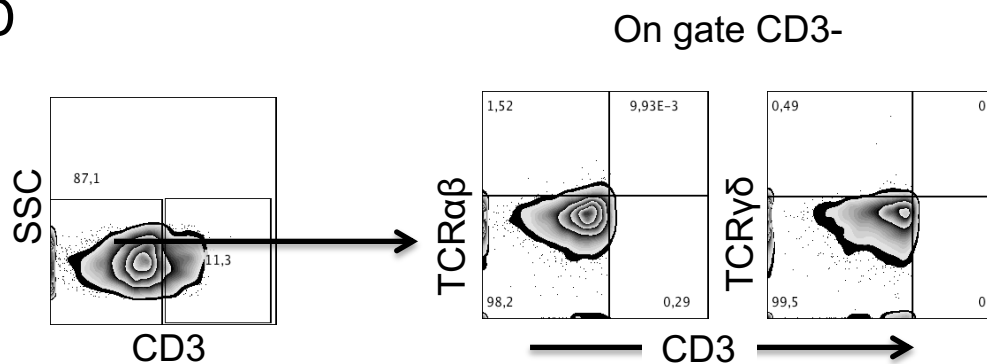

FIGURE S1
