# Supplementary material for: CD3+ Macrophages Deliver Proinflammatory Cytokines by a CD3- and Transmembrane TNF-Dependent Pathway and Are Increased at the BCG-Infection Site
Source: PubMed Central journal article supplement (PMC6855269; doi:10.3389/fimmu.2019.02550), 2019-11-07
Supplement: Image_2.pdf [file Image_2.pdf]

**A**

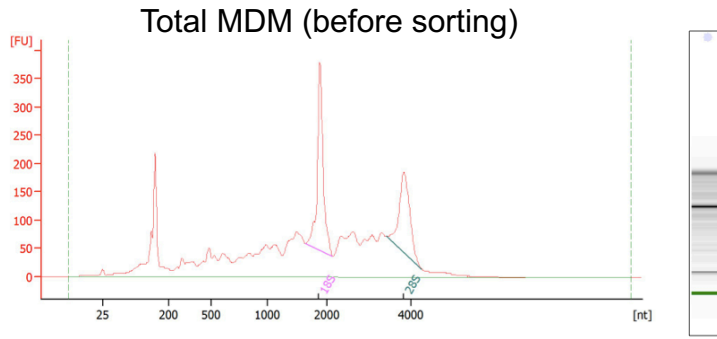

**Overall Results for sample 2 : Sample 2**

RNA Area: 3,999.8      RNA Integrity Number (RIN): 6.4 (B.02.08)  
 RNA Concentration: 18,764 pg/μl      Result Flagging Color:  
 rRNA Ratio [28s / 18s]: 0.7      Result Flagging Label: **RIN: 6.40**

**Fragment table for sample 2 : Sample 2**

| Name | Start Size [nt] | End Size [nt] | Area  | % of total Area |
|------|-----------------|---------------|-------|-----------------|
| 18S  | 1,639           | 2,134         | 487.6 | 12.2            |
| 28S  | 3,416           | 4,275         | 318.3 | 8.0             |

**B**

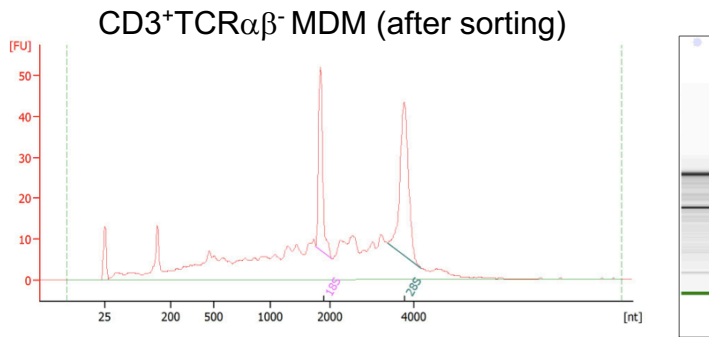

**Overall Results for sample 4 : Sample 4**

RNA Area: 511.0      RNA Integrity Number (RIN): 6.6 (B.02.08)  
 RNA Concentration: 2,397 pg/μl      Result Flagging Color:  
 rRNA Ratio [28s / 18s]: 1.5      Result Flagging Label: **RIN: 6.60**

**Fragment table for sample 4 : Sample 4**

| Name | Start Size [nt] | End Size [nt] | Area | % of total Area |
|------|-----------------|---------------|------|-----------------|
| 18S  | 1,756           | 2,037         | 44.9 | 8.8             |
| 28S  | 3,364           | 4,181         | 67.5 | 13.2            |

**C**

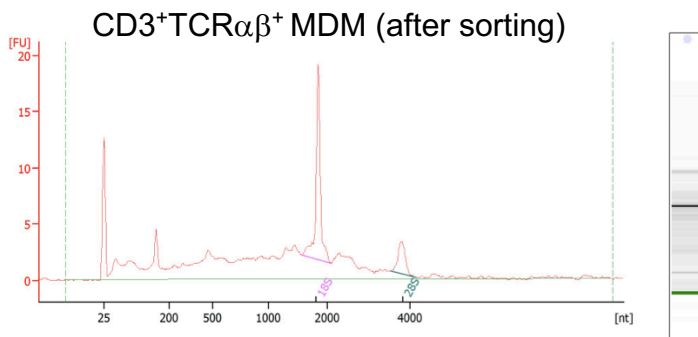

**Overall Results for sample 5 : Sample 5**

RNA Area: 146.8      RNA Integrity Number (RIN): 6.3 (B.02.08)  
 RNA Concentration: 689 pg/μl      Result Flagging Color:  
 rRNA Ratio [28s / 18s]: 0.2      Result Flagging Label: **RIN: 6.30**

**Fragment table for sample 5 : Sample 5**

| Name | Start Size [nt] | End Size [nt] | Area | % of total Area |
|------|-----------------|---------------|------|-----------------|
| 18S  | 1,565           | 2,080         | 19.5 | 13.3            |
| 28S  | 3,521           | 4,134         | 4.5  | 3.1             |

**FIGURE S2**
