# Supplementary material for: CD3+ Macrophages Deliver Proinflammatory Cytokines by a CD3- and Transmembrane TNF-Dependent Pathway and Are Increased at the BCG-Infection Site
Source: PubMed Central journal article supplement (PMC6855269; doi:10.3389/fimmu.2019.02550), 2019-11-07
Supplement: Image_4.pdf [file Image_4.pdf]

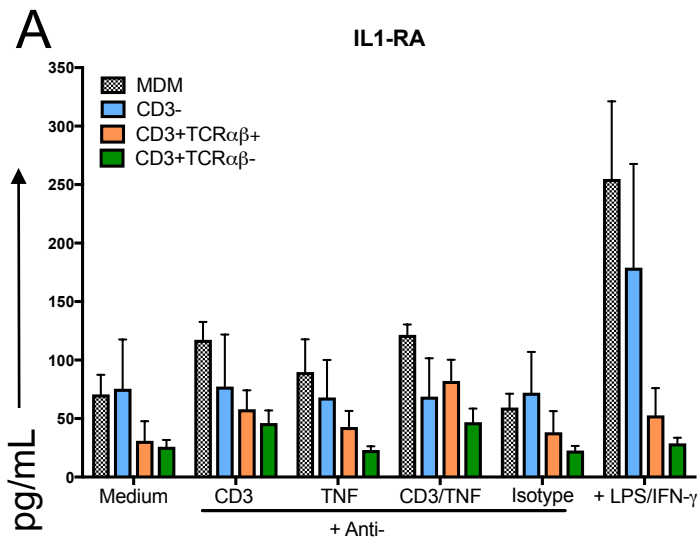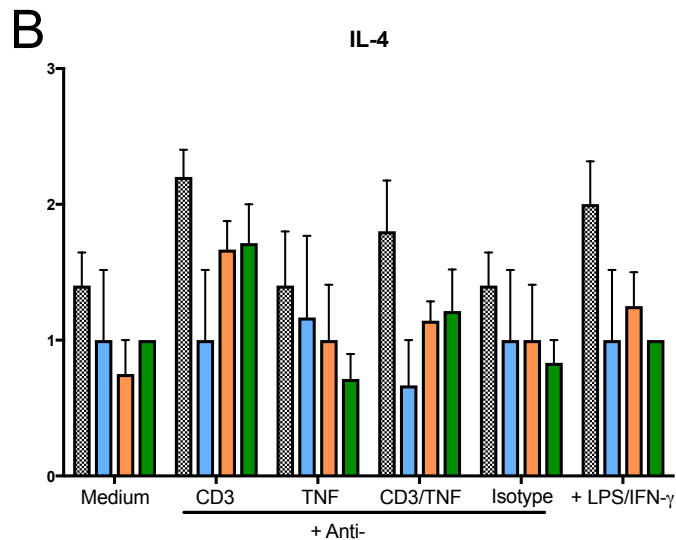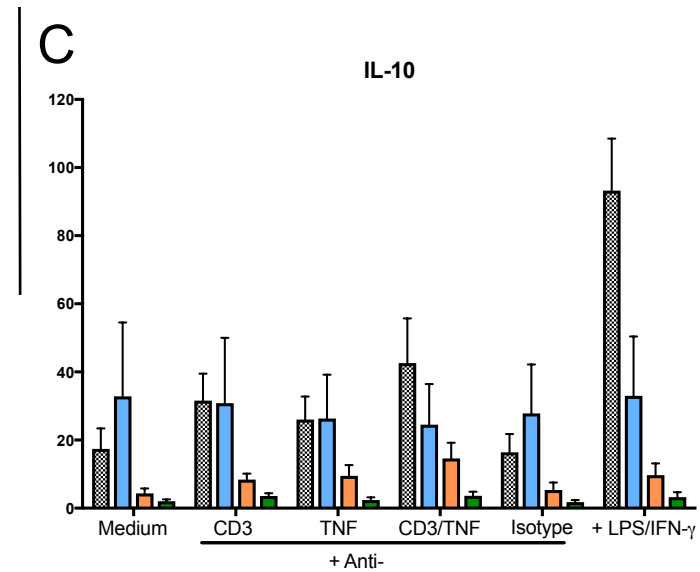

FIGURE S4
