# Supplementary material for: CD3+ Macrophages Deliver Proinflammatory Cytokines by a CD3- and Transmembrane TNF-Dependent Pathway and Are Increased at the BCG-Infection Site
Source: PubMed Central journal article supplement (PMC6855269; doi:10.3389/fimmu.2019.02550), 2019-11-07
Supplement: Table_1.pdf [file Table_1.pdf]

Table 1. Clone and fluorochrome of antibodies

| Antigen        | Reactivity | Clone    | Fluorochrome | Manufacturer |
|----------------|------------|----------|--------------|--------------|
| CD80           | Human      | 2D10     | APC          | Biolegend    |
| CD86           | Human      | IT2.2    | PE Cy7       | Biolegend    |
| CD11b          | Human      | ICRF44   | PerCP Cy5.5  | Biolegend    |
| CD68           | Human      | Y1/82A   | PE           | Biolegend    |
| CD14           | Human      | 63D3     | FITC         | Biolegend    |
| CD14           | Human      | M5E2     | BV510        | Biolegend    |
| CD16           | Human      | 3G8      | PE Cy7       | Biolegend    |
| HLA-DR         | Human      | L243     | APC          | Biolegend    |
| HLA-A,B,C      | Human      | W6/32    | PE Cy7       | Biolegend    |
| CD3 $\epsilon$ | Human      | HIT3a    | APC Cy7      | Biolegend    |
| TCR $\alpha$   | Human      | IP26     | FITC         | Biolegend    |
| TCR $\alpha$   | Human      | IP26     | BV421        | Biolegend    |
| TCR $\gamma$   | Human      | B1       | PE           | Biolegend    |
| CD1a           | Human      | HI149    | PerCP Cy5.5  | Biolegend    |
| CD1b           | Human      | SN13     | FITC         | Biolegend    |
| CD1c           | Human      | L161     | PerCP Cy5.5  | Biolegend    |
| CD1d           | Human      | 51.1     | PE           | Biolegend    |
| CD2            | Human      | TS1/8    | BV421        | Biolegend    |
| CCR2           | Human      | K036C2   | PE           | Biolegend    |
| CCR4           | Human      | L291H4   | PE Cy7       | Biolegend    |
| TNF            | Human      | Mab11    | BV421        | Biolegend    |
| CD11b          | Mice       | M1/70    | FITC         | Biolegend    |
| CD3 $\epsilon$ | Mice       | 145-2C11 | APC Cy7      | Biolegend    |
| TCR $\alpha$   | Mice       | H57-597  | PE Cy7       | Biolegend    |
| TNFR1          | Mice       | 55R-286  | APC          | Biolegend    |
| TNFR2          | Mice       | TR75-89  | PE           | Biolegend    |
